# Supplementary material for: SARS-CoV-2 Serum Neutralization Assay: A Traditional Tool for a Brand-New Virus
Source: PubMed Central journal article supplement (PMC8069482; doi:10.3390/v13040655), 2021-04-10

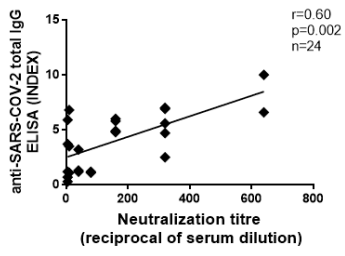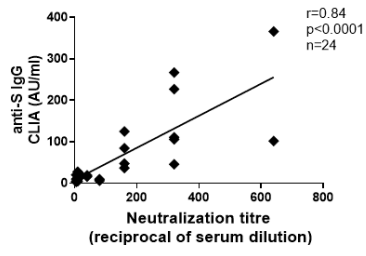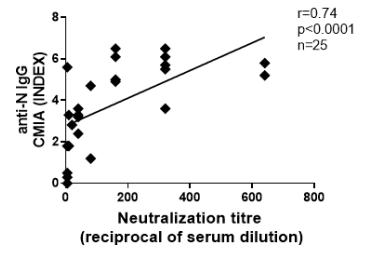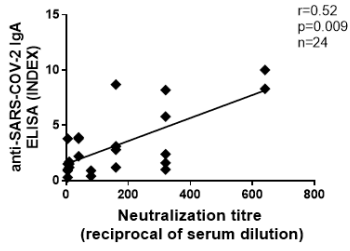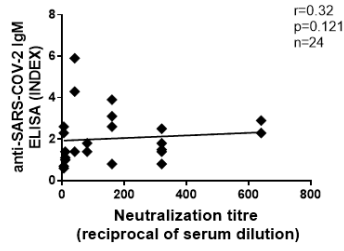

Supplement: viruses-13-00655-s001.pdf [file viruses-13-00655-s001.pdf]
